# Supplementary material
Source: PubMed Central journal article supplement (PMC4817692)

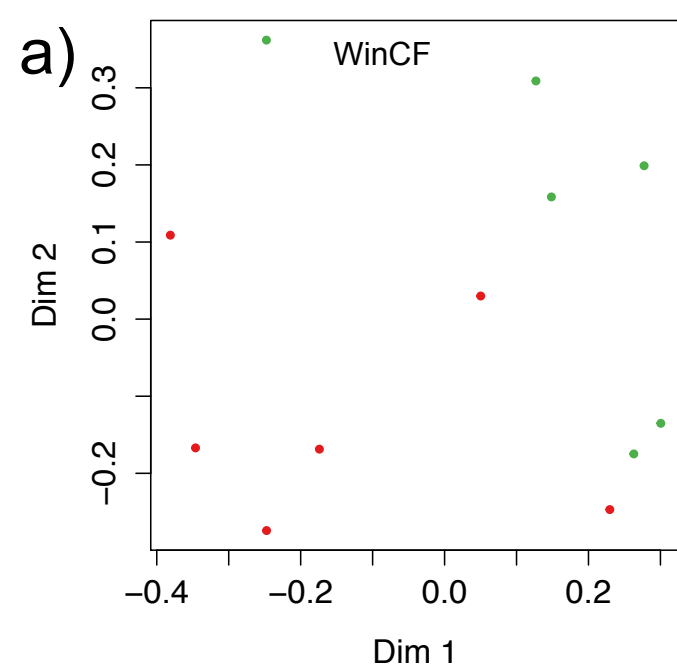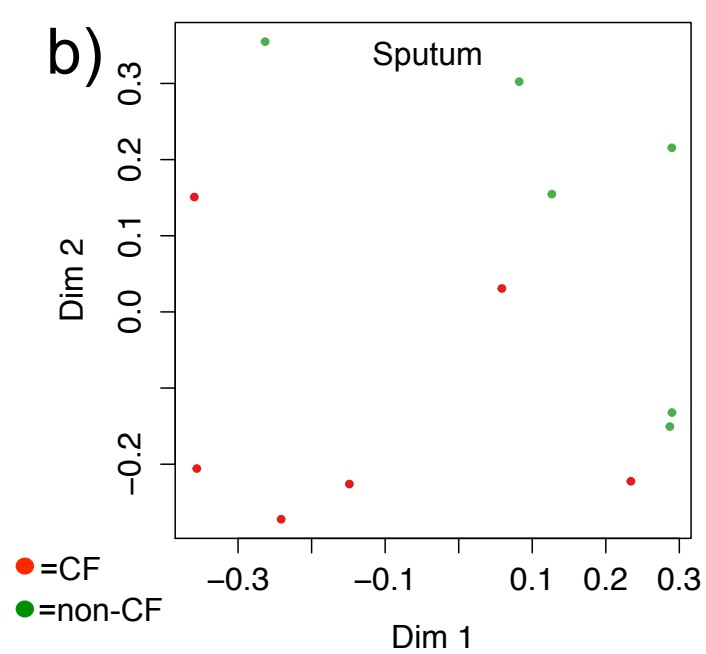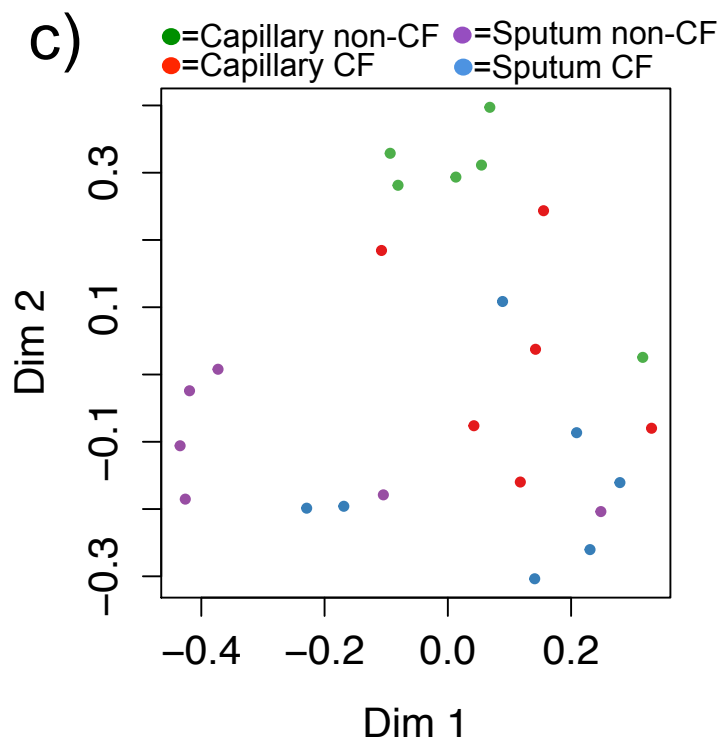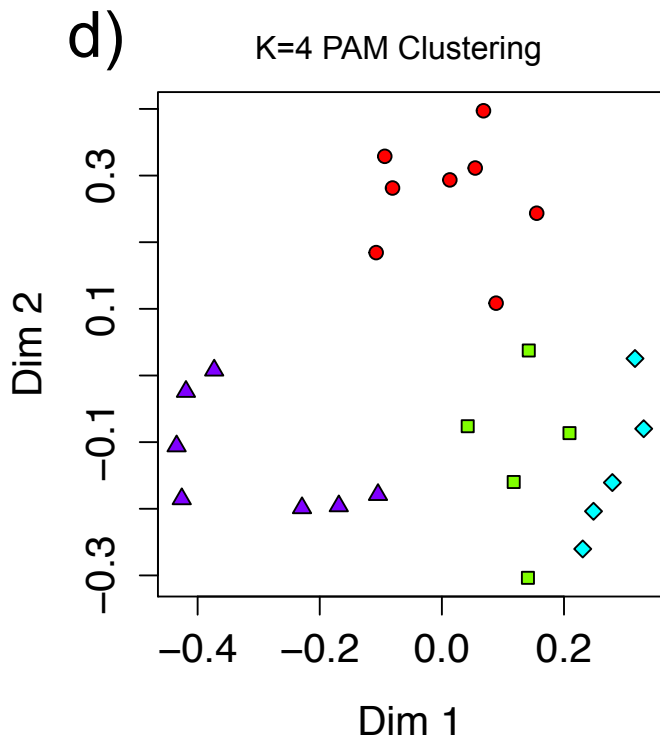

Supplement: ismej2014234x10.pdf [file ismej2014234x10.pdf]
